# Supplementary material for: A 2-D π–π dimer model system to investigate structure-charge transfer relationships in rubrene
Source: Royal Society of Chemistry journal article supplement (doi:10.1039/c8tc06412a), 2019-01-01
Supplement: c8tc06412a1.pdf [file c8tc06412a1.pdf]

# Electronic Supplementary Information for:

## A 2-D dimer model system to investigate structure-charge transfer relationships in rubrene

*Sherlyn C. Jing,<sup>a</sup> Callum J. McHugh<sup>b\*</sup> and Jesus Calvo-Castro<sup>a\*</sup>*

<sup>a</sup> School of Life and Medical Sciences, University of Hertfordshire, Hatfield, AL10 9AB, UK.

<sup>b</sup> School of Computing, Engineering and Physical Sciences, University of the West of Scotland, Paisley, PA1 2BE, UK.

\*Corresponding author: [j.calvo-castro@herts.ac.uk](mailto:j.calvo-castro@herts.ac.uk), [callum.mchugh@uws.ac.uk](mailto:callum.mchugh@uws.ac.uk).

|                                                                                                                                                       | Page       |
|-------------------------------------------------------------------------------------------------------------------------------------------------------|------------|
| <b>SI.1 Chemical structures and space-filled representation for <math>\pi</math>-<math>\pi</math> dimer pairs of reported PDPP crystal structures</b> | <b>2-9</b> |

**SI.1 Chemical structures and space-filled representation for the investigated  $\pi$ - $\pi$  dimer pairs of reported rubrene-based crystal structures**

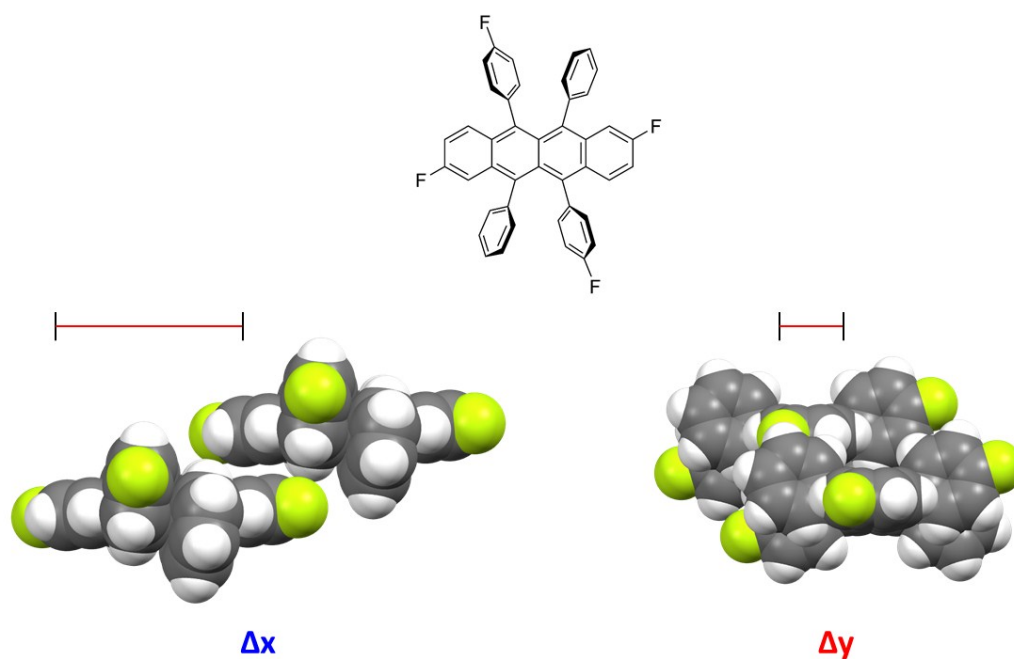

**Figure SI.1.1** Chemical structure and space-filled illustration of  $\pi$ - $\pi$  dimer pair of **AXIDER**.

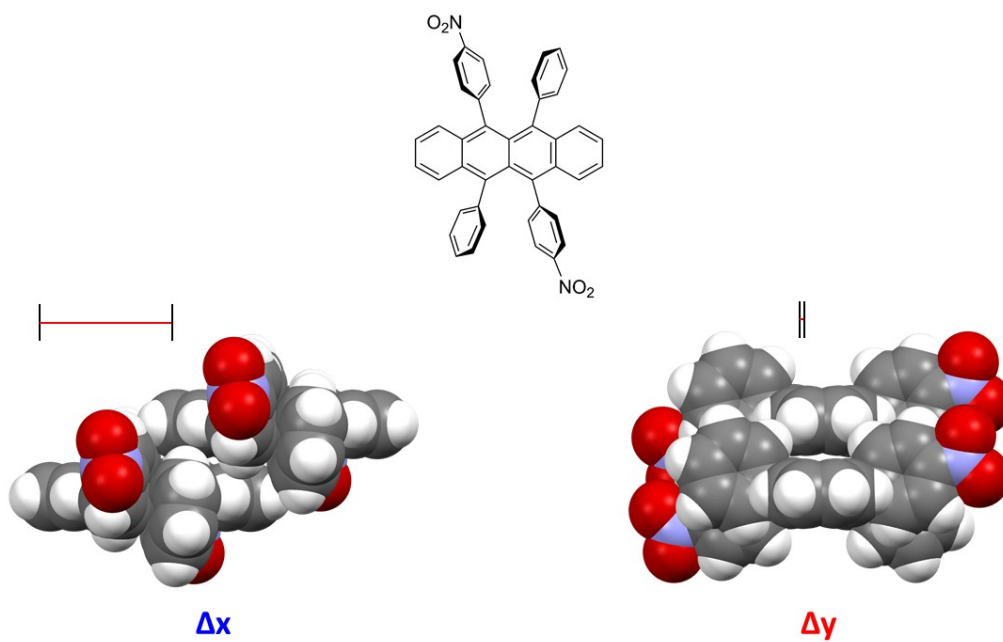

**Figure SI.1.2** Chemical structure and space-filled illustration of  $\pi$ - $\pi$  dimer pair of **CIYNAB**.

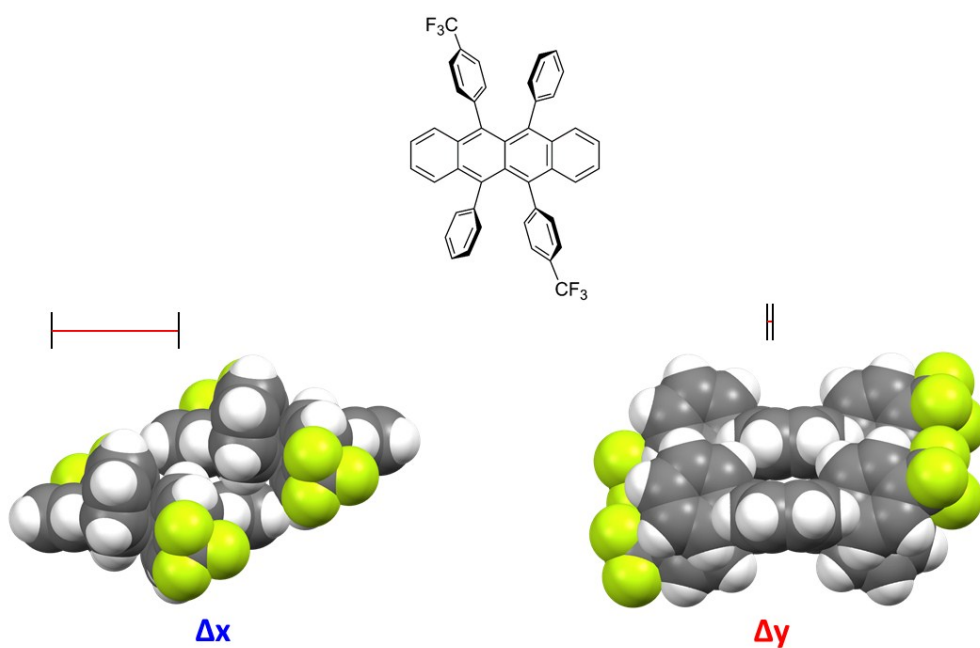

**Figure SI.1.3** Chemical structure and space-filled illustration of  $\pi$ - $\pi$  dimer pair of **CIYXUF**.

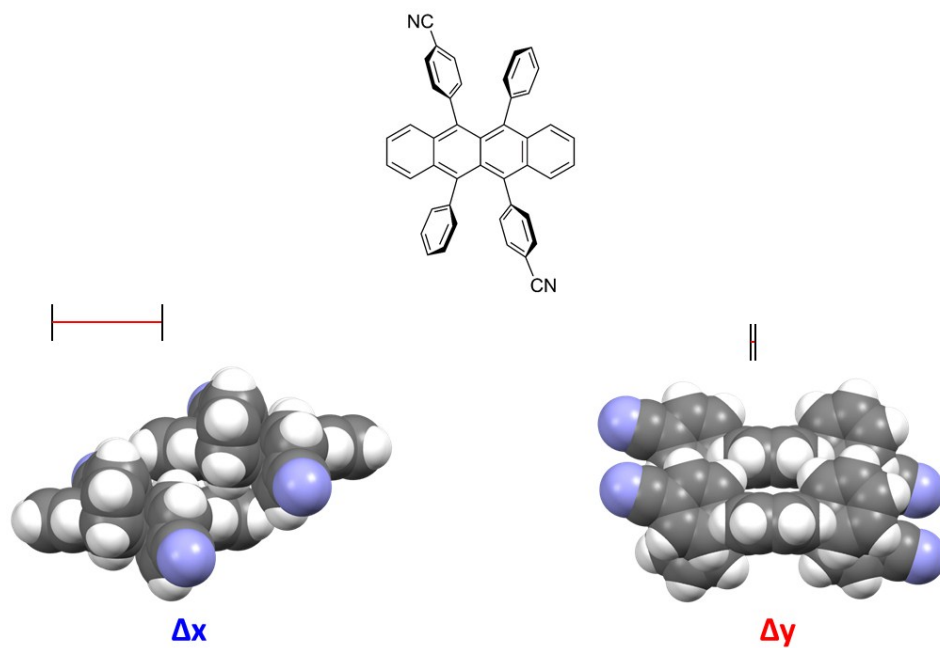

**Figure SI.1.4** Chemical structure and space-filled illustration of  $\pi$ - $\pi$  dimer pair of **CIYYAM**.

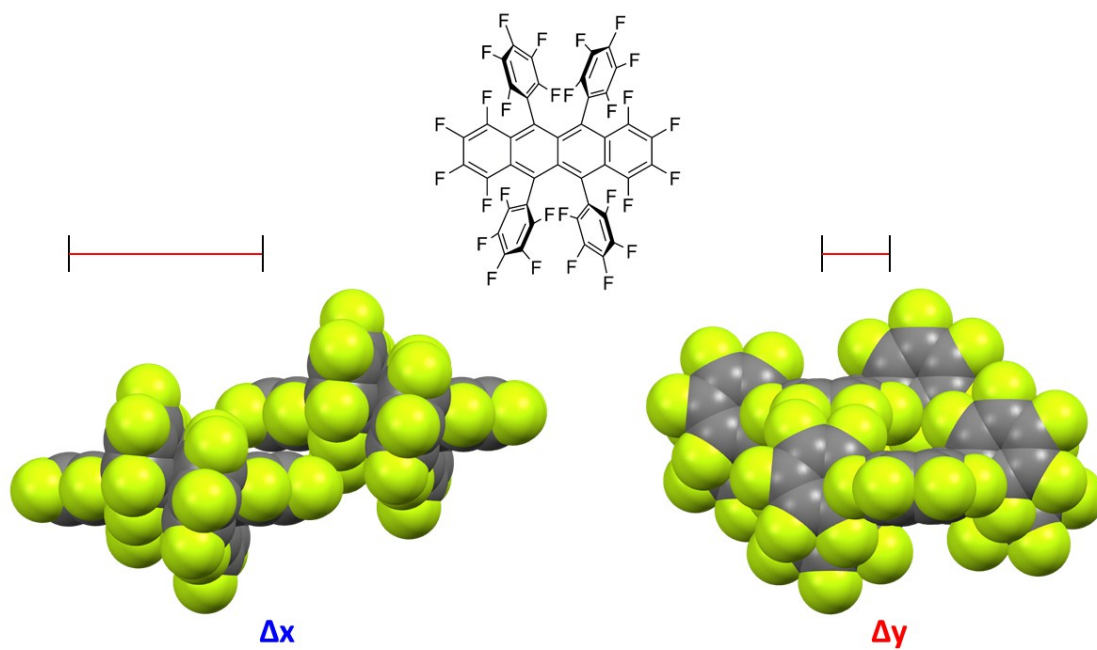

**Figure SI.1.5** Chemical structure and space-filled illustration of  $\pi$ - $\pi$  dimer pair of **INELUK02**.

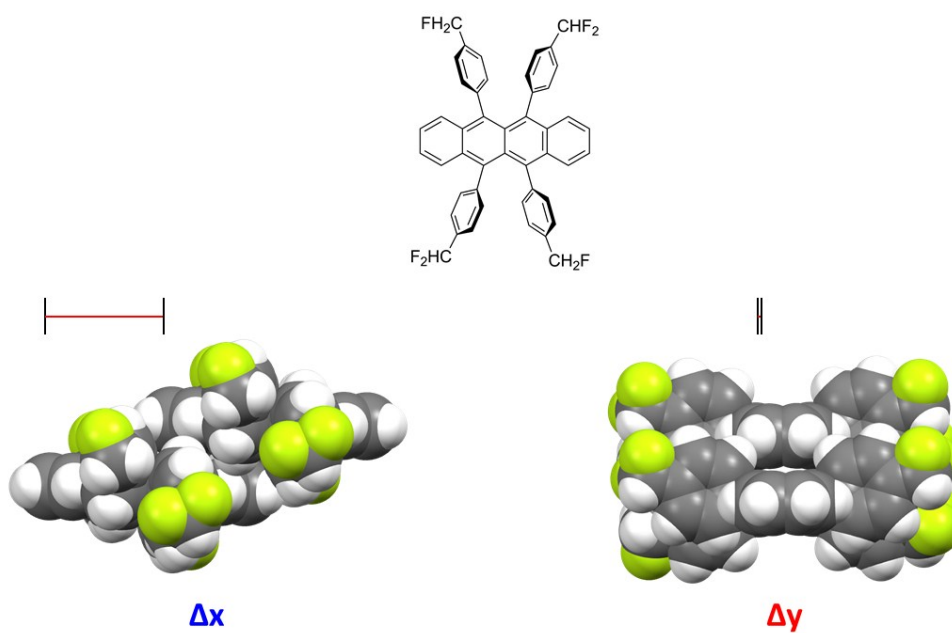

**Figure SI.1.6** Chemical structure and space-filled illustration of  $\pi$ - $\pi$  dimer pair of **KUSDEJ**.

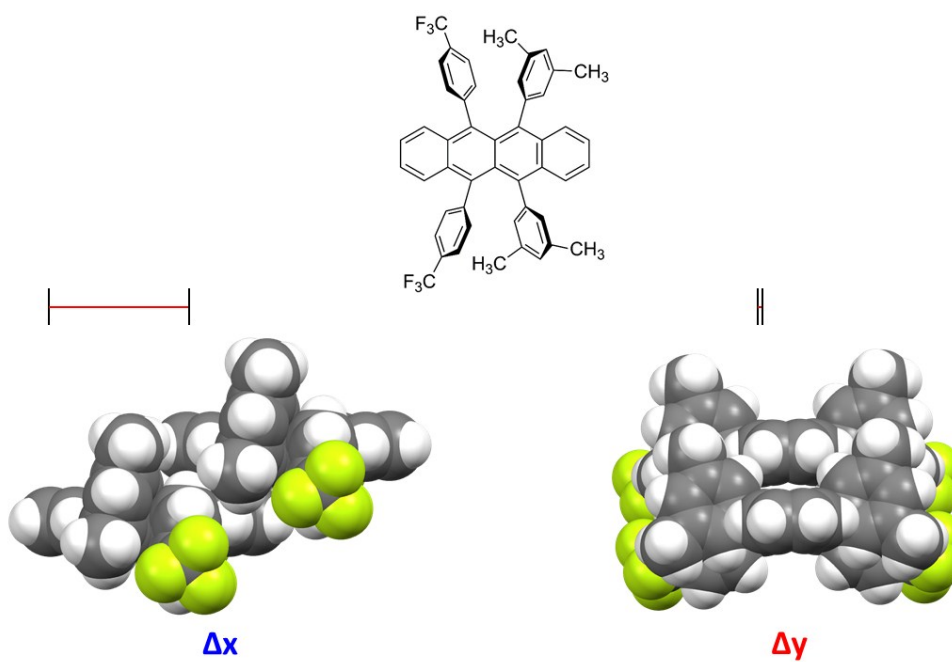

**Figure SI.1.7** Chemical structure and space-filled illustration of  $\pi$ - $\pi$  dimer pair of **MIVDOM**.

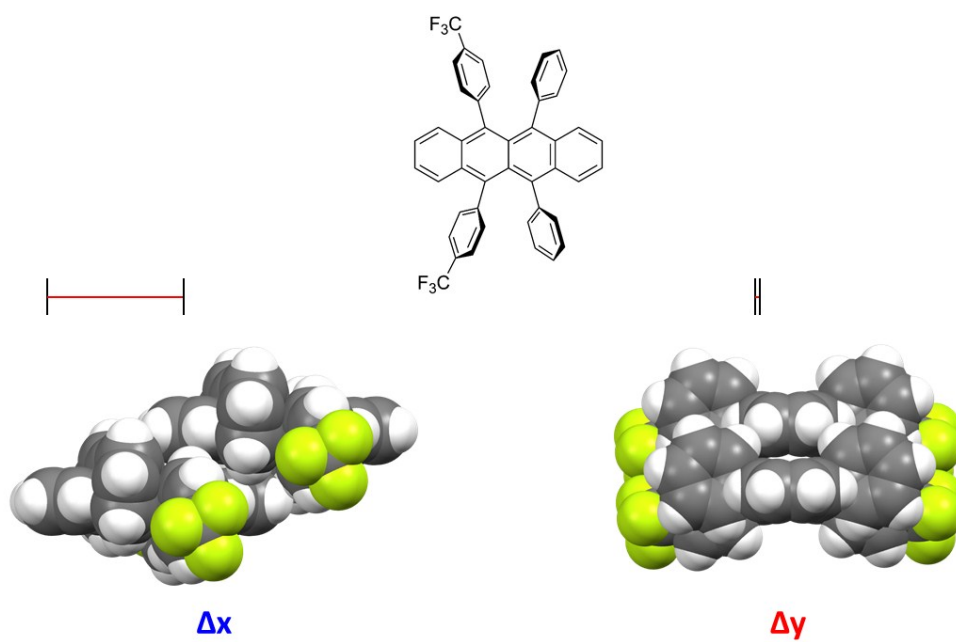

**Figure SI.1.8** Chemical structure and space-filled illustration of  $\pi$ - $\pi$  dimer pair of **MIVDUS**.

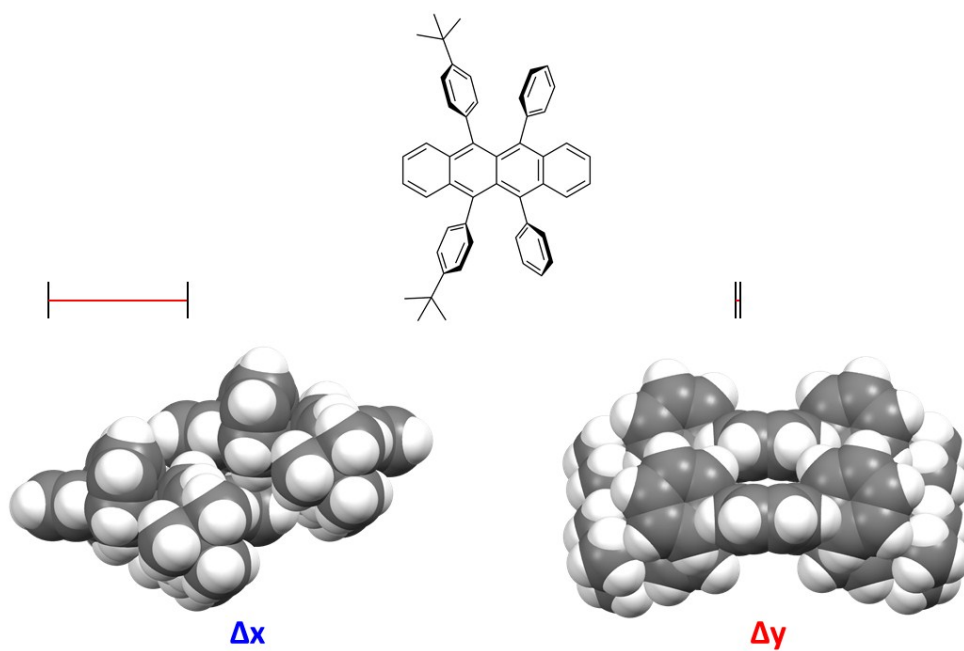

**Figure SI.1.9** Chemical structure and space-filled illustration of  $\pi$ - $\pi$  dimer pair of **PIFHIW**.

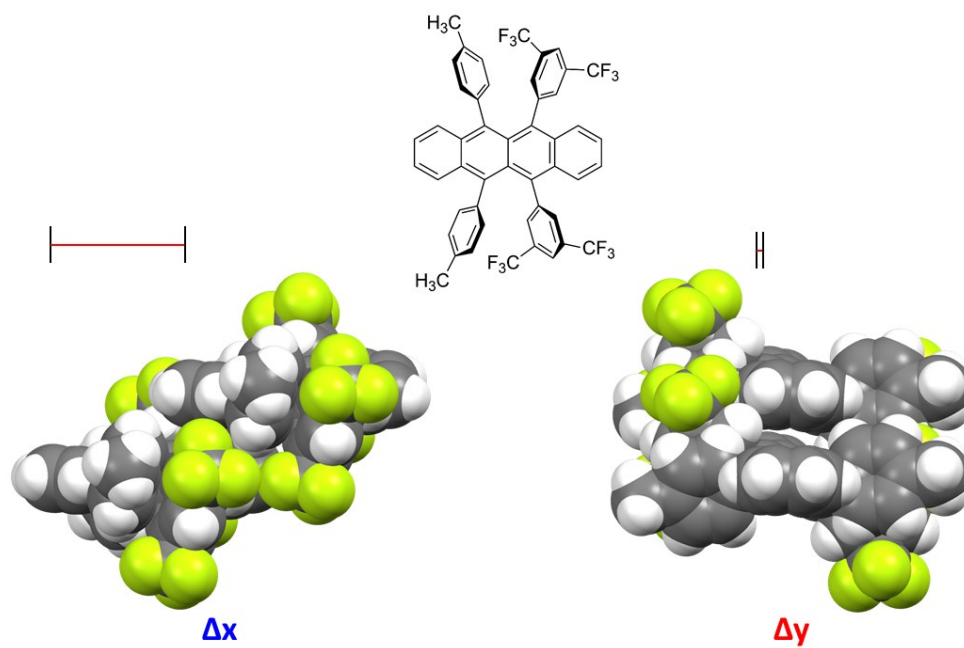

**Figure SI.1.10** Chemical structure and space-filled illustration of  $\pi$ - $\pi$  dimer pair of **RAGCEK**.

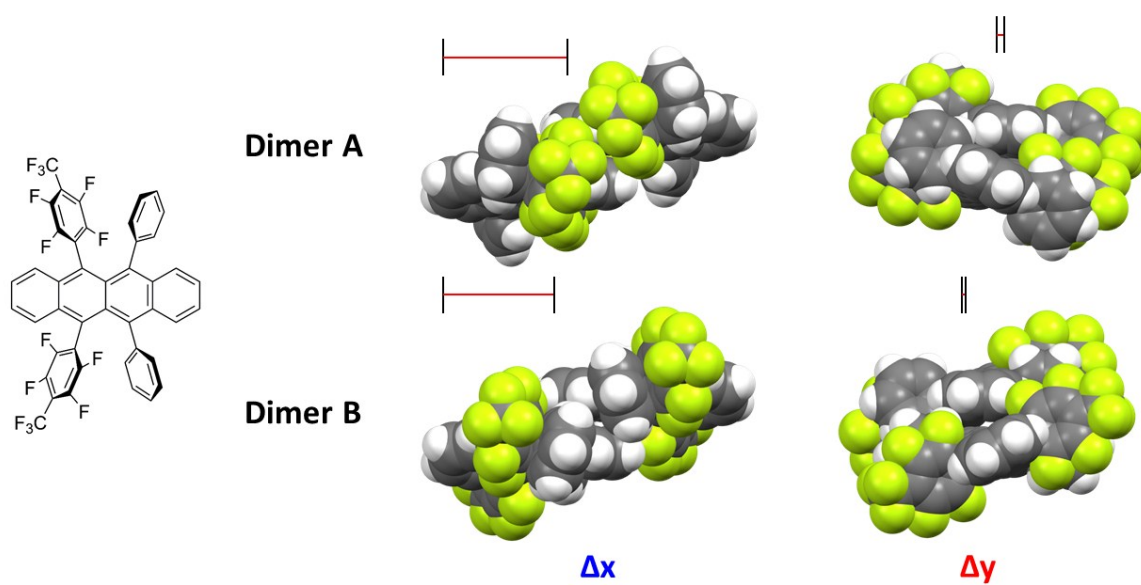

**Figure SI.1.11** Chemical structure and space-filled illustration of  $\pi$ - $\pi$  dimer pair of **RAGCUA**.

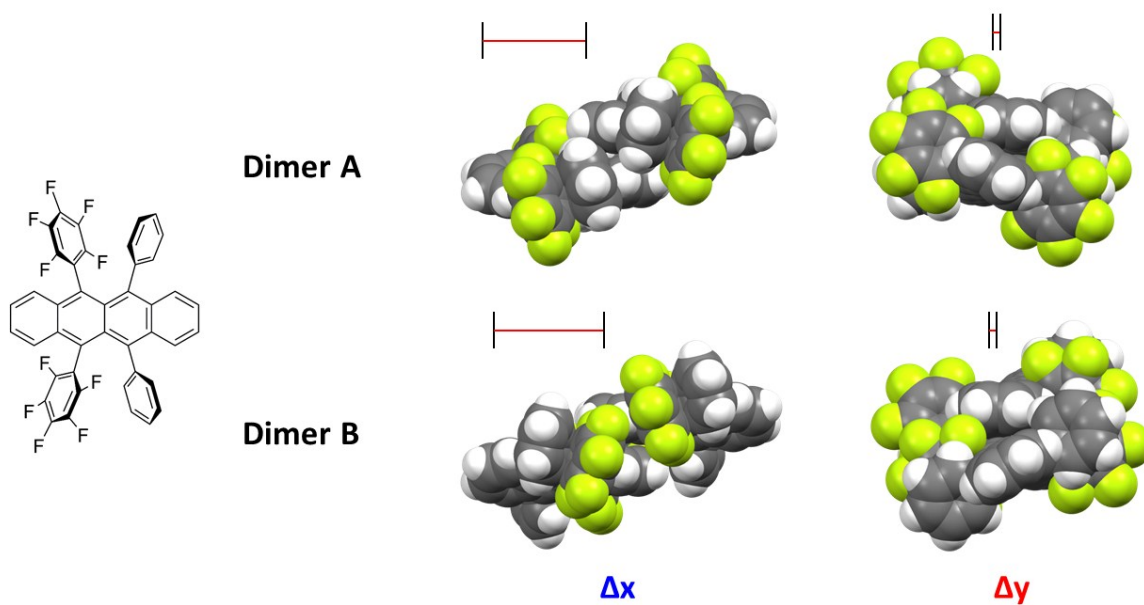

**Figure SI.1.12** Chemical structure and space-filled illustration of  $\pi$ - $\pi$  dimer pair of **RAGDEL**.

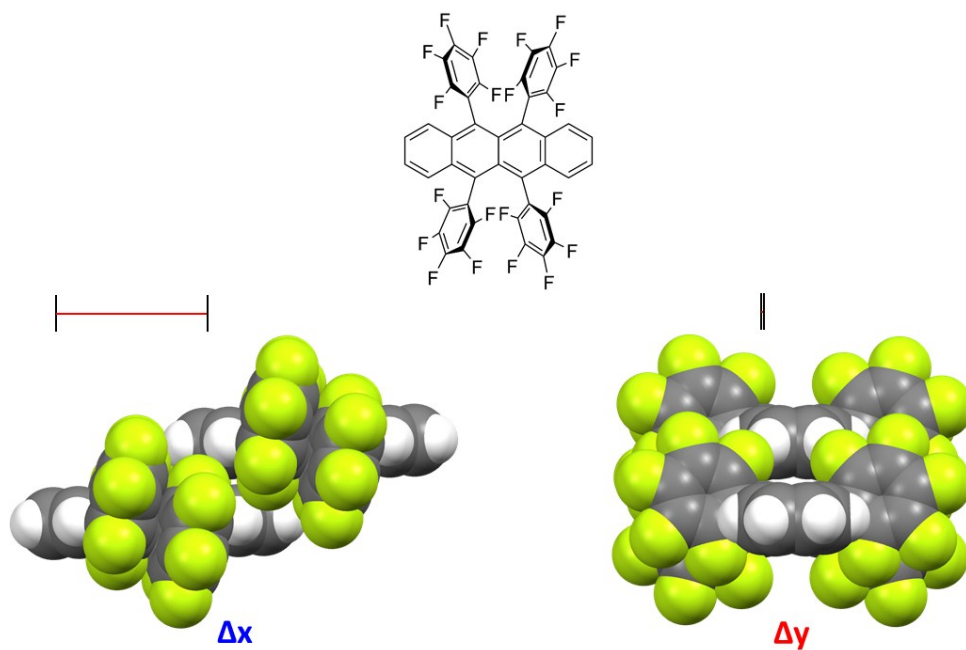

**Figure SI.1.13** Chemical structure and space-filled illustration of  $\pi$ - $\pi$  dimer pair of **RAGDIP**.



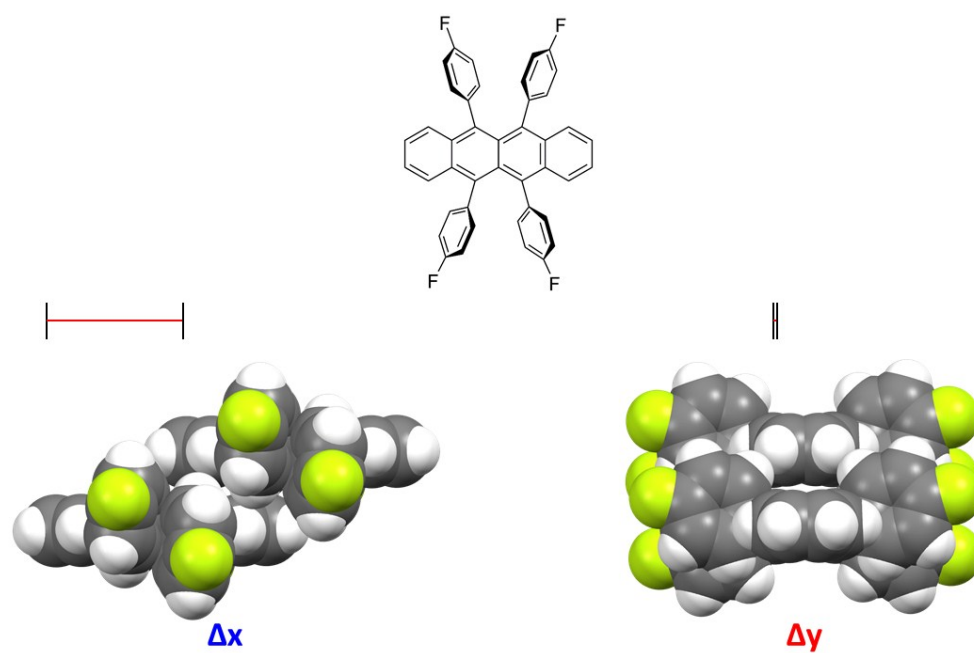

**Figure SI.1.14** Chemical structure and space-filled illustration of  $\pi$ - $\pi$  dimer pair of **TOMVUM**.
